# Supplementary material for: Iron metabolic pathways in the processes of sponge plasticity
Source: PLOS journal article supplement (doi:10.1371/journal.pone.0228722), 2020-02-21
Supplement: S8 (10.1371/journal.pone.0228722.s008) [file journal.pone.0228722.s008]

**S1 Table. Transrate report for transcriptome assemblies.**

|                                                              | <b>H. dujardini</b> | <b>H. panicea</b> |
|--------------------------------------------------------------|---------------------|-------------------|
| Contig metrics                                               |                     |                   |
| # of contigs                                                 | 583,538             | 798,940           |
| # of contigs with length <200                                | 204                 | 161               |
| # of contigs with length >1000                               | 88,154              | 109,739           |
| # of contigs with length >10000                              | 532                 | 541               |
| smallest contig length                                       | 178                 | 178               |
| largest contig length                                        | 125,246             | 45,348            |
| mean contig length                                           | 691                 | 643.54            |
| N90                                                          | 289                 | 281               |
| N70                                                          | 513                 | 466               |
| N50                                                          | 999                 | 875               |
| N30                                                          | 2,145               | 1,839             |
| N10                                                          | 4,796               | 4,310             |
| # of contigs with ORF                                        | 78,936              | 168,512           |
| % of contigs with ORF                                        | 13.5%               | 21.1%             |
| mean % of the contig length covered by the ORF               | 50.9%               | 63.1%             |
| gc content                                                   | 46.0%               | 43.0%             |
| Read mapping (general)                                       |                     |                   |
| # of read pairs provided                                     | 291,295,519         | 146,912,616       |
| # of read pairs mapped                                       | 271,666,726         | 129,064,589       |
| # of read pairs mapping in a way indicative of good assembly | 252,763,186         | 114,994,645       |

|                                                                   |             |             |
|-------------------------------------------------------------------|-------------|-------------|
| # of reads pairs mapping in a way indicative of bad assembly      | 18,903,540  | 14,069,944  |
| # of potential links btwn contigs that are supported by the reads | 371,972     | 298,252     |
| Read mapping (absolute values)                                    |             |             |
| # bases in contigs                                                | 402,980,722 | 514,179,169 |
| # of bases that are not covered by any reads                      | 43,015,603  | 55,685,856  |
| # of contigs that contain at least one base with no read coverage | 361,090     | 401,368     |
| # of contigs that have a mean per-base read coverage of < 1       | 27,267      | 33,998      |
| # of contigs that have a mean per-base read coverage of < 10      | 28,706      | 408,726     |
| # of contigs that have >=50% est. chance of being segmented       | 63,552      | 59,636      |
| # of good contigs (optimizing assembly score)                     | 291,557     | 420,248     |
| Read mapping (%)                                                  |             |             |
| % of the provided read pairs that mapped successfully             | 93.3%       | 87.9%       |
| % of read pairs mapping in a way indicative of a good assembly    | 86.8%       | 78.3%       |
| % of read pairs mapping in a way indicative of bad assembly       | 6.5%        | 9.6%        |
| % of bases that are not covered by any reads                      | 10.7%       | 10.8%       |
| % of contigs that contain at least one base with no read coverage | 61.9%       | 50.2%       |
| % of contigs that have mean per-base read coverage of < 1         | 4.7%        | 4.3%        |
| % of contigs that have mean per-base read coverage of < 10        | 4.9%        | 51.2%       |
| % of contigs that have >=50% est. chance of being segmented       | 10.9%       | 7.5%        |
| % of good contigs (optimizing assembly score)                     | 50.0%       | 52.6%       |
| TRANSRATE ASSEMBLY SCORE                                          | 0.17        | 0.19        |
