# Supplementary material for: Iron metabolic pathways in the processes of sponge plasticity
Source: PLOS journal article supplement (doi:10.1371/journal.pone.0228722), 2020-02-21
Supplement: S9 (10.1371/journal.pone.0228722.s009) [file journal.pone.0228722.s009]

**S2 Table. BUSCO report for transcriptome assemblies.**

| Assembly            | BUSCOs found | Database (total number of records) |        |               |        |                |        |             |        |
|---------------------|--------------|------------------------------------|--------|---------------|--------|----------------|--------|-------------|--------|
|                     |              | Eukaryotes (303)                   |        | Metazoa (978) |        | Bacteria (148) |        | Fungi (290) |        |
| <i>H. dujardini</i> | Complete     | 295                                | 97.36% | 899           | 91.92% | 135            | 91.22% | 266         | 91.72% |
|                     | Single-copy  | 267                                | 88.12% | 815           | 83.33% | 45             | 30.41% | 222         | 76.55% |
|                     | Duplicated   | 28                                 | 9.24%  | 84            | 8.59%  | 90             | 60.81% | 44          | 15.17% |
|                     | Fragmented   | 2                                  | 0.66%  | 27            | 2.76%  | 6              | 4.05%  | 18          | 6.21%  |
|                     | Missing      | 6                                  | 1.98%  | 52            | 5.32%  | 7              | 4.73%  | 6           | 2.07%  |
| <i>H. panicea</i>   | Complete     | 300                                | 99.01% | 954           | 97.55% | 146            | 98.65% | 280         | 96.55% |
|                     | Single-copy  | 118                                | 38.94% | 529           | 54.09% | 15             | 10.14% | 94          | 32.41% |
|                     | Duplicated   | 182                                | 60.07% | 425           | 43.46% | 131            | 88.51% | 186         | 64.14% |
|                     | Fragmented   | 2                                  | 0.66%  | 15            | 1.53%  | 1              | 0.68%  | 10          | 3.45%  |
|                     | Missing      | 1                                  | 0.33%  | 9             | 0.92%  | 1              | 0.68%  | 0           | 0.00%  |
